# Supplementary material for: Influence of temperatures and loadings on olefin diffusion in MFI-type zeolites in one- to three-dimensions
Source: Royal Society of Chemistry journal article supplement (doi:10.1039/d3cy01590d), 2024-01-01
Supplement: d3cy01590d2.pdf [file d3cy01590d2.pdf]

## Supporting Information

**Table S1. Self-diffusion coefficients of propylene in one and three dimensions**

|          | $D_s$   | $D_x$   | $D_y$   | $D_z$   |
|----------|---------|---------|---------|---------|
| System 1 | 1.8387  | 2.37955 | 2.65249 | 0.48405 |
| System 2 | 2.61355 | 3.43277 | 3.11402 | 1.29386 |
| System 3 | 3.76683 | 6.33421 | 4.40895 | 0.55731 |
| System 4 | 4.87606 | 5.66039 | 7.61823 | 1.34957 |
| System 5 | 5.50115 | 7.03339 | 7.66663 | 1.80343 |
| System 6 | 5.99429 | 6.16076 | 9.94255 | 1.87957 |

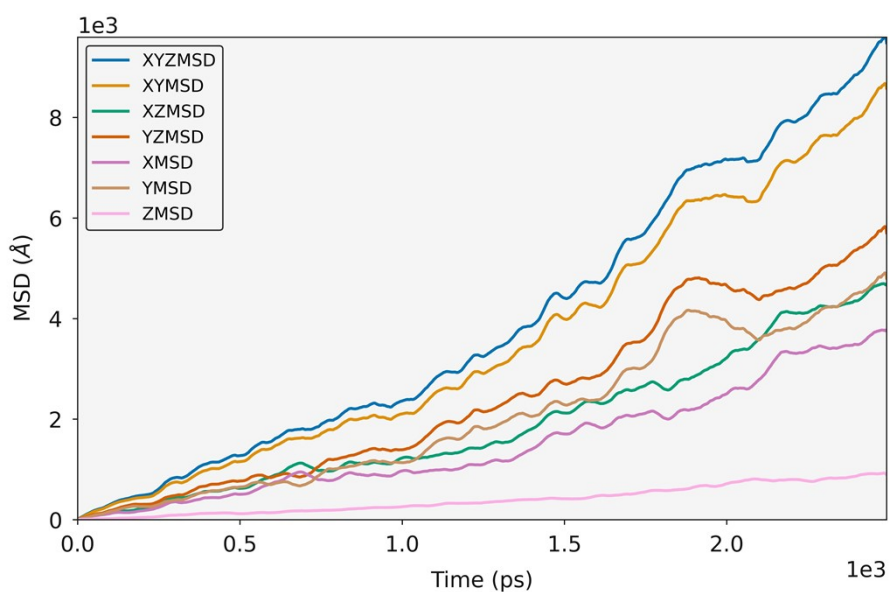

**Figure S1 MSD of propylene in one and two dimensions in system 6.**

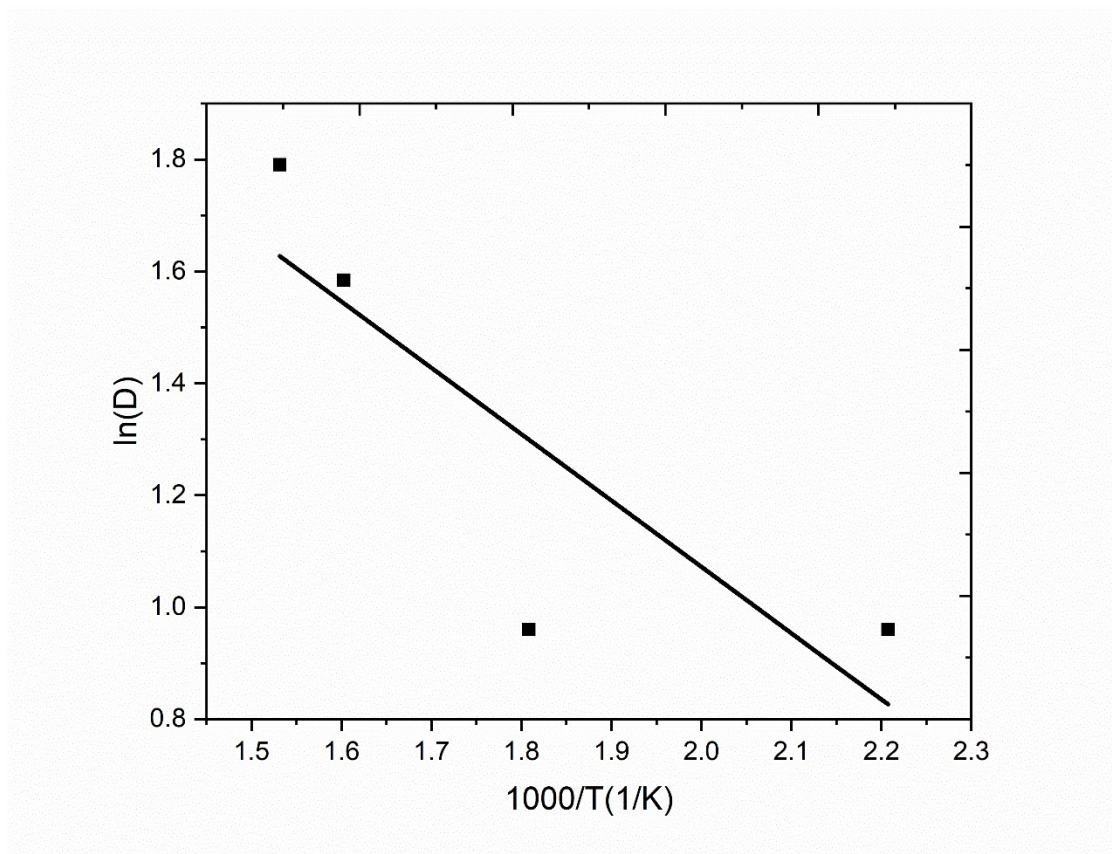

**Figure S2.** Arrhenius representation of the self-diffusion coefficients of propylene.

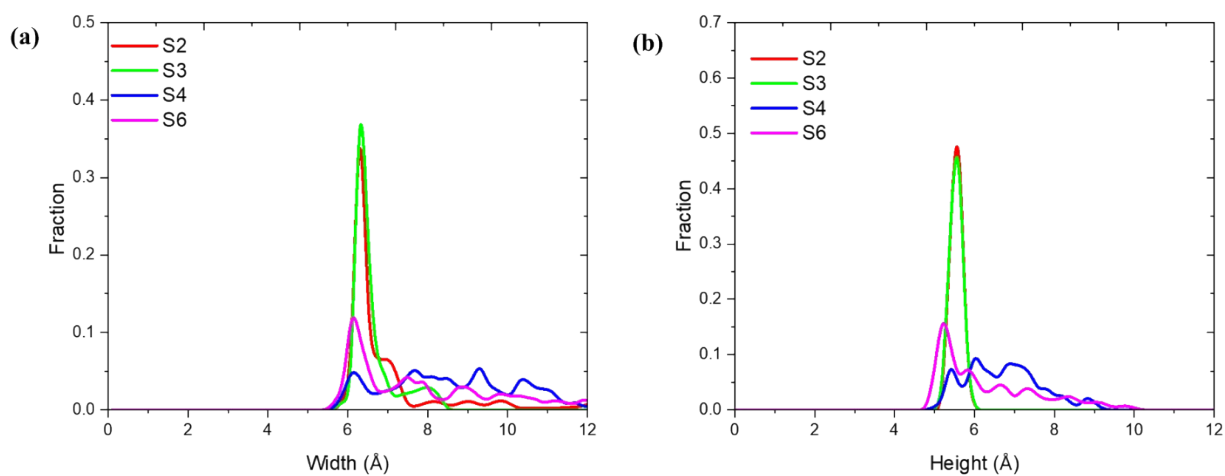

**Figure S3.** The distribution of (a) height (b) width for propylene molecule inside MFI zeolite at different temperatures

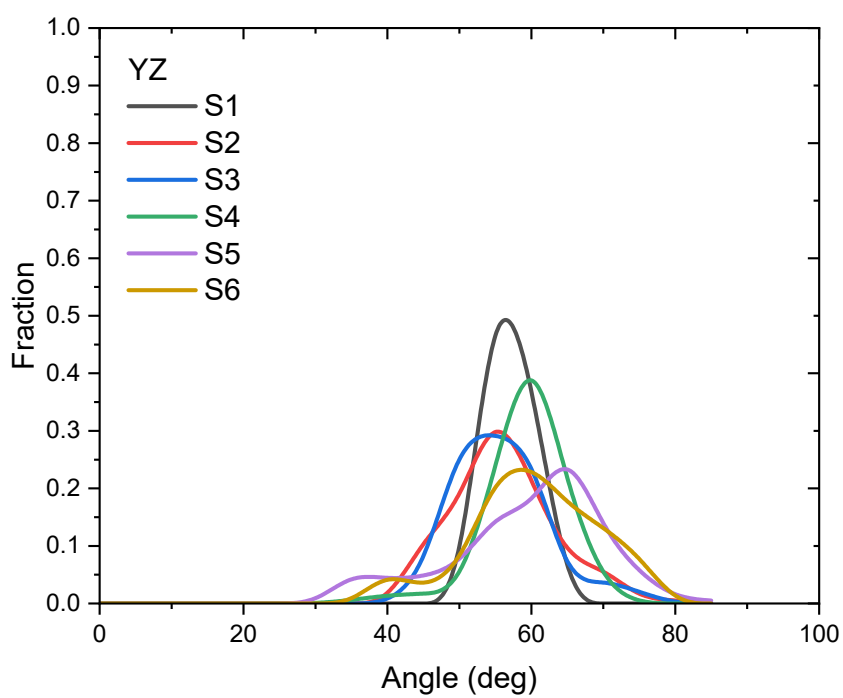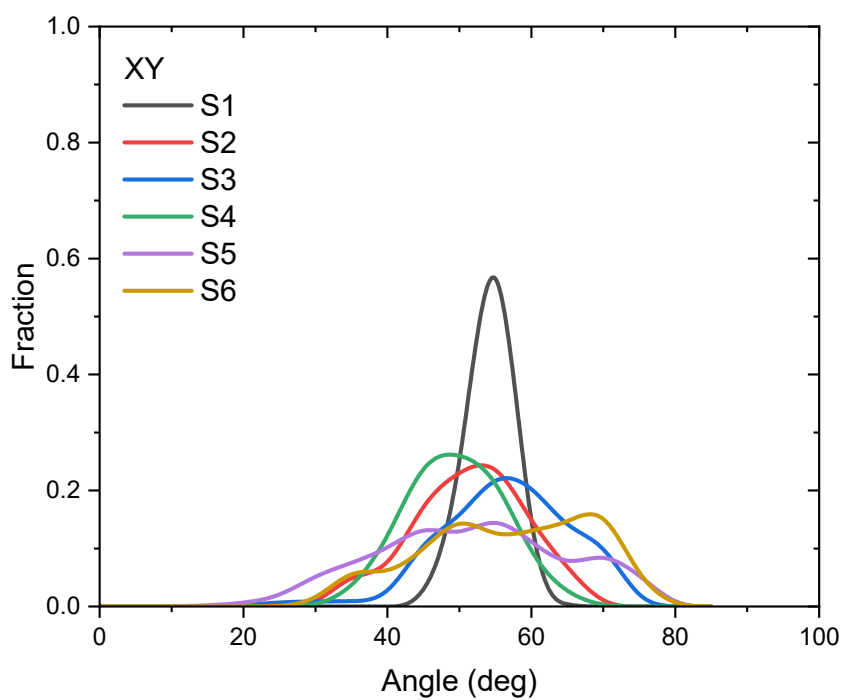

**Figure S4.** Angle distribution of propylene molecules with respect to the  $xz$  plane.

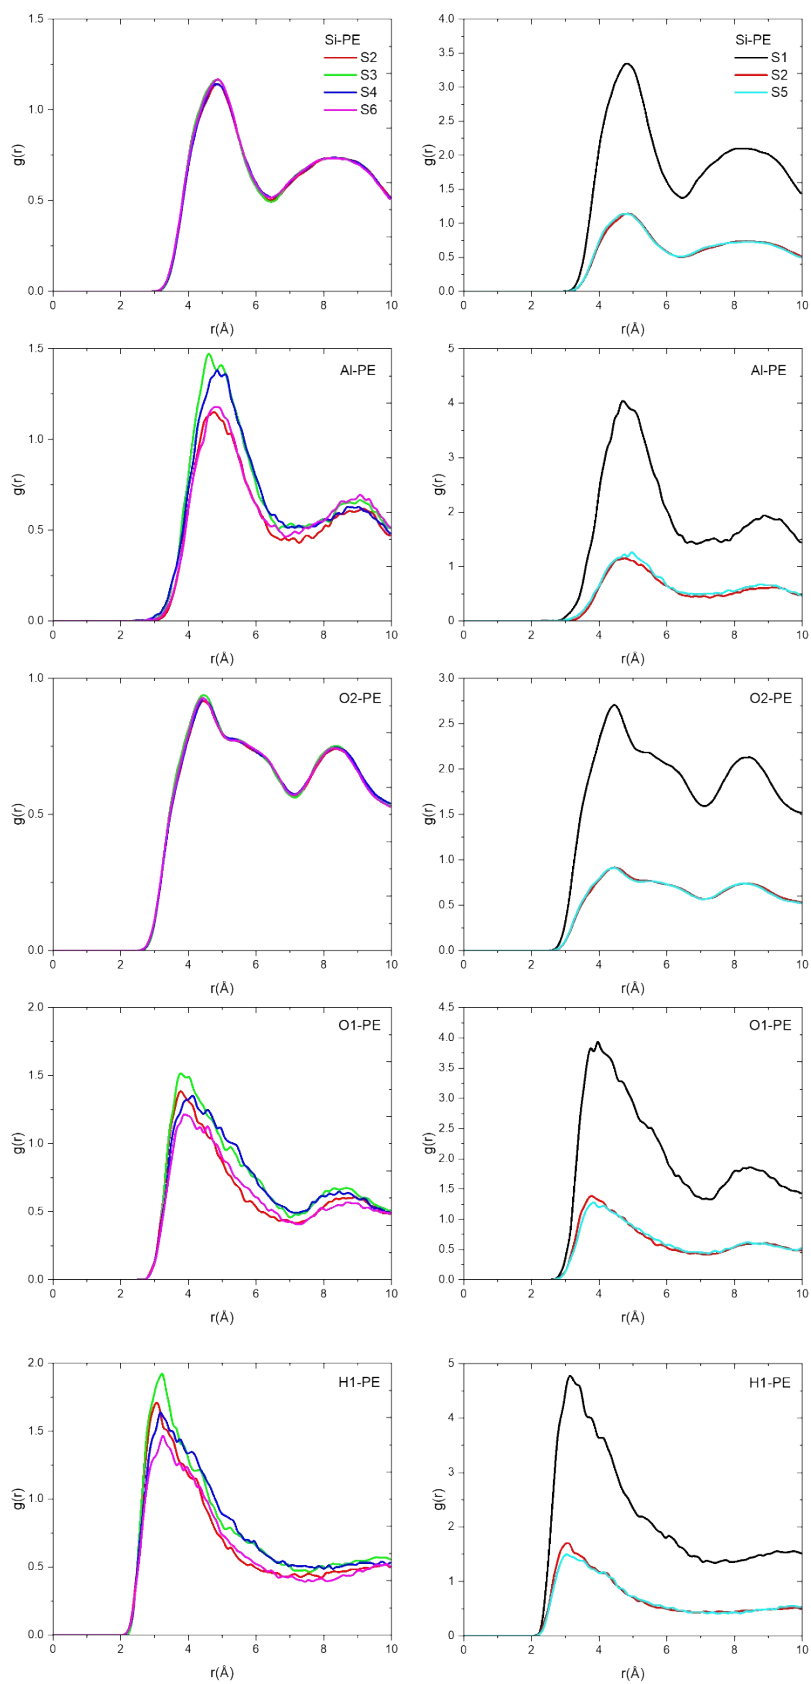

**Figure S5.** Radial distribution function of propylene molecules and each atom in MFI for all systems at different temperature
